# Supplementary material
Source: PubMed Central journal article supplement (PMC7213755)
Supplement: NIHMS1583510-supplement-suppl.pdf [file NIHMS1583510-supplement-suppl.pdf]

## Supplementary Appendix

This appendix has been provided by the authors to give readers additional information about their work.

Supplement to: Landgren O, Thomas A, Mailankody S. Myeloma and second primary cancers. *N Engl J Med* 2011;365:2241-2.

**TABLE-1. Selected studies focusing on second malignancies following multiple myeloma**

| Study                                     | Study design (study period)                                                                                         | Pts, n | % with second malignancy                          | Multiple myeloma to second malignancy, median time     | Hematologic malignancy, n                          | Solid tumor, n                                     |
|-------------------------------------------|---------------------------------------------------------------------------------------------------------------------|--------|---------------------------------------------------|--------------------------------------------------------|----------------------------------------------------|----------------------------------------------------|
| <sup>a</sup> Mailankody et al., 2011      | Population-based registry study (1986-2005)                                                                         | 8740   | 1.4%                                              | 45.3 months (AML/MDS)                                  | 69                                                 | 508                                                |
| <sup>b</sup> Hasskarl et al, 2011         | Retrospective study, single institution (1997-2008)                                                                 | 589    | 3%                                                | 35 months                                              | 6                                                  | 12                                                 |
| <sup>c</sup> Attal, et al., 2010*         | Randomized phase III trial, maintenance lenalidomide vs. placebo after high-dose melphalan/ASCT                     | 614    | 5.5% (lenalidomide maintenance)<br>1% (placebo)   | 44 months                                              | # Lenalidomide maintenance: 11<br># Placebo arm: 3 | # Lenalidomide maintenance: 12<br># Placebo arm: 3 |
| <sup>d</sup> McCarthy et al., 2010*       | Randomized phase III trial, maintenance lenalidomide vs. placebo after high-dose melphalan/ASCT                     | 460    | 6.5% (lenalidomide maintenance)<br>2.6% (placebo) | 17.5 months after ASCT                                 | # Lenalidomide maintenance: 8<br># Placebo arm: 0  | # Lenalidomide maintenance: 10<br># Placebo arm: 4 |
| <sup>e</sup> Palumbo et al., 2010*        | Randomized phase III trial, maintenance lenalidomide vs. placebo after low-dose melphalan/prednisone+/-lenalidomide | 459    | 3.9% (lenalidomide maintenance)<br>1.3% (placebo) | 25 months                                              | # MPR-R arm: 7<br># MPR arm: 5<br># MP arm: 1      | # MPR-R: 5<br># MPR: 4<br># MP: 3                  |
| <sup>f</sup> Barlogie et al, 2008         | Retrospective study, single institution (1989-2007)                                                                 | 2418   | 1%                                                | NR                                                     | 26                                                 | NR                                                 |
| <sup>g</sup> Finnish Leukemia Group, 2000 | Retrospective study based on patients from clinical trials (1979-1985)                                              | 432    | 9.2%                                              | 37 months (solid tumors)<br>56 months (acute leukemia) | 17                                                 | 23                                                 |
| <sup>h</sup> Govindarajan et al, 1996     | Prospective study (NR)                                                                                              | 188    | 3.7%                                              | 63 months                                              | 7                                                  | NR                                                 |
| <sup>i</sup> Cuzick et al, 1987           | Retrospective study based on patients from clinical trials (1964-1975)                                              | 648    | 1.8%                                              | 82 months                                              | 12                                                 | NR                                                 |
| <sup>j</sup> Bergsagel et al, 1979        | Prospective study (1973-1977)                                                                                       | 364    | 3.8%                                              | NR                                                     | 14                                                 | NR                                                 |
| <sup>k</sup> Kyle et al., 1970            | Case series (1965-1966)                                                                                             | 3      | N/A                                               | 45 months                                              | 3                                                  | NR                                                 |
| <sup>l</sup> Edwards and Zawadski, 1966   | Case series (1950-1966)                                                                                             | 8      | N/A                                               | 10 years                                               | 1                                                  | NR                                                 |
| <sup>m</sup> Nordenson, 1966              | Retrospective study, multi institution (1932-1963)                                                                  | 310    | 2.2%                                              | NR                                                     | 7                                                  | NR                                                 |

**Legend:** \* These results come from interim analyses presented at the American Society of Hematology meeting in Orlando, Florida, December 2010. # Updated numbers from presentations at the International Myeloma Workshop in Paris, France, May 2011. At this time, the final analyses and written reports have not yet been published.

References: <sup>a</sup>Mailankody S, Pfeiffer RM, Kristinsson SY, et al. Risk of acute myeloid leukemia and myelodysplastic syndromes following multiple myeloma and its precursor disease (MGUS). *Blood* 2011;118:4086-92. <sup>b</sup>Hasskarl J, Ihorst G, De Pasquale D, et al. Association of multiple myeloma with different neoplasms: systematic analysis in consecutive patients with myeloma. *Leuk Lymphoma* 2011;52:247-59. <sup>c</sup>Attal M, Lauwers VC, Marit G, et al. Maintenance Treatment with Lenalidomide After Transplantation for Myeloma: Final Analysis of the IFM 2005-02. *Blood* 2010;116:310. <sup>d</sup>McCarthy PL, Owzar K, Anderson KC, et al. Phase III Intergroup Study of Lenalidomide Versus Placebo Maintenance Therapy Following Single Autologous Hematopoietic Stem Cell Transplantation (AHSCT) for Multiple Myeloma: CALGB 100104. *Blood* 2010;116:37. <sup>e</sup>Palumbo A, Bringhen S, Cavalli M, et al. A Phase 3 Study Evaluating the Efficacy and Safety of Lenalidomide Combined with Melphalan and Prednisone In Patients 65 Years with Newly Diagnosed Multiple Myeloma (NDMM): Continuous Use of Lenalidomide Vs Fixed-Duration Regimens. *Blood* 2010;116:622. <sup>f</sup>Barlogie B, Tricot G, Haessler J, et al. Cytogenetically defined myelodysplasia after melphalan-based autotransplantation for multiple myeloma linked to poor hematopoietic stem-cell mobilization: the Arkansas experience in more than 3,000 patients treated since 1989. *Blood* 2008;111:94-100. <sup>g</sup>Acute leukaemia and other secondary neoplasms in patients treated with conventional chemotherapy for multiple myeloma: a Finnish Leukaemia Group study. *European journal of haematology* 2000;65:123-7. <sup>h</sup>Govindarajan R, Jagannath S, Flick JT, et al. Preceding standard therapy is the likely cause of MDS after autotransplants for multiple myeloma. *British journal of haematology* 1996;95:349-53. <sup>i</sup>Cuzick J, Erskine S, Edelman D, Galton DA. A comparison of the incidence of the myelodysplastic syndrome and acute myeloid leukaemia following melphalan and cyclophosphamide treatment for myelomatosis. A report to the Medical Research Council's working party on leukaemia in adults. *British journal of cancer*

1987;55:523-9. <sup>j</sup>Bergsagel DE, Bailey AJ, Langley GR, MacDonald RN, White DF, Miller AB. The chemotherapy on plasma-cell myeloma and the incidence of acute leukemia. The New England journal of medicine 1979;301:743-8. <sup>k</sup>Kyle RA, Pierre RV, Bayrd ED. Multiple myeloma and acute myelomonocytic leukemia. The New England journal of medicine 1970;283:1121-5. <sup>l</sup>Edwards GA, Zawadzki ZA. Extrasosseous lesions in plasma cell myeloma. A report of six cases. Am J Med. 1967 Aug;43(2):194-205. <sup>m</sup>Nordenson NG. Myelomatosis. A clinical review of 310 cases. Acta Medica Scandinavica Supplementum 1966;445:178-86.

**Abbreviations:** MDS = myelodysplastic syndrome; AML = acute myeloid leukemia; ASCT = autologous stem cell transplantation; NR = not reported; MPR-R = melphalan/ prednisone, revlimid (lenalidomide), with revlimid maintenance; MPR = melphalan/ prednisone, revlimid (lenalidomide), without revlimid maintenance; MP = melphalan/ prednisone, without revlimid maintenance.
